# Supplementary material for: Spatial and temporal variations in snow chemistry along a traverse from coastal East Antarctica to the ice sheet summit (Dome A)
Source: Copernicus journal article supplement (doi:10.5194/tc-2020-255), 2020-09-25
Supplement: Supplementary file [file tc-2020-255-AC5-supplement.zip]

1 **Supplementary materials**

2 Three figures, i.e., Fig. S1, Fig. S2 and Fig. S3, are included in the supplementary materials.

3

4

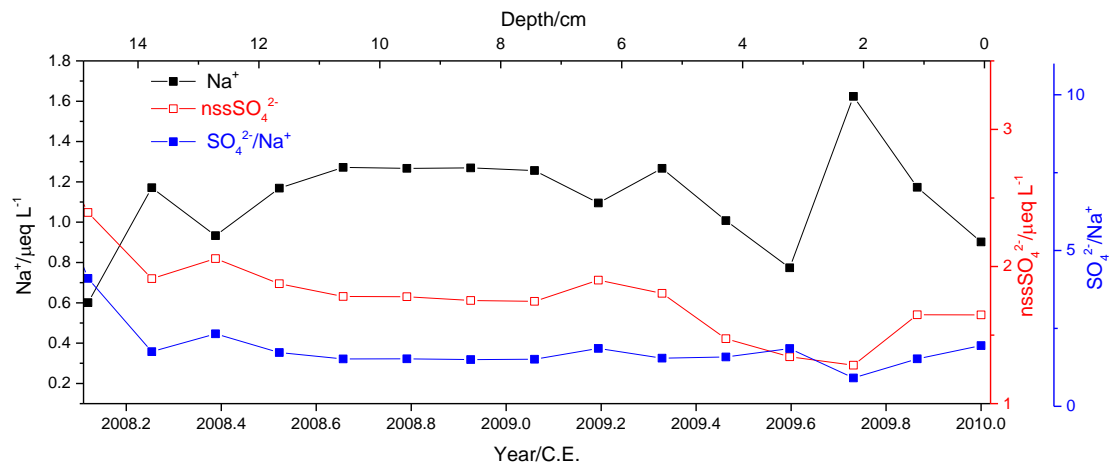

5

6 **Figure S1.** Variations in  $\text{Na}^+$ ,  $\text{nssSO}_4^{2-}$ , and  $\text{SO}_4^{2-}/\text{Na}^+$  ratio in the snow in the years 2008 and 2009, in  
7 Dome A snow pit (P3).

8

9

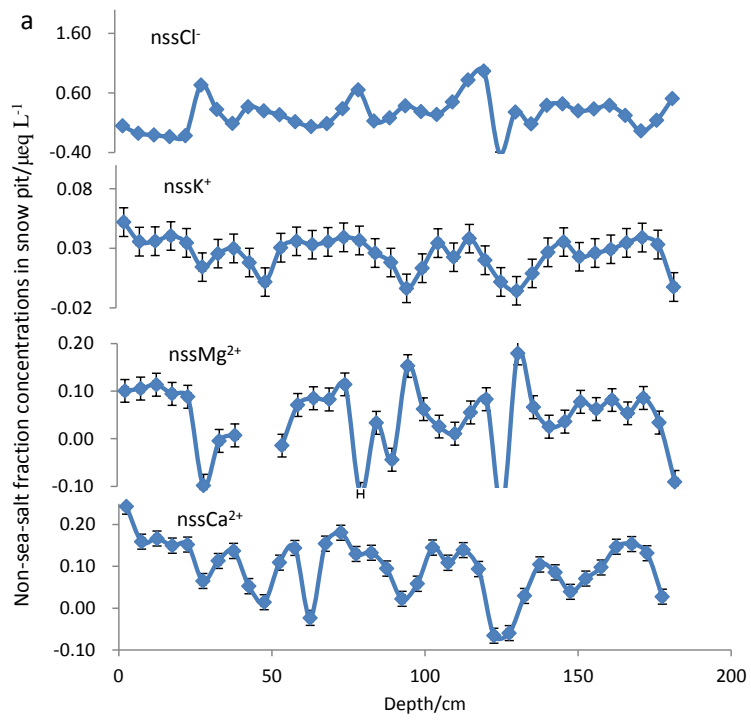

10

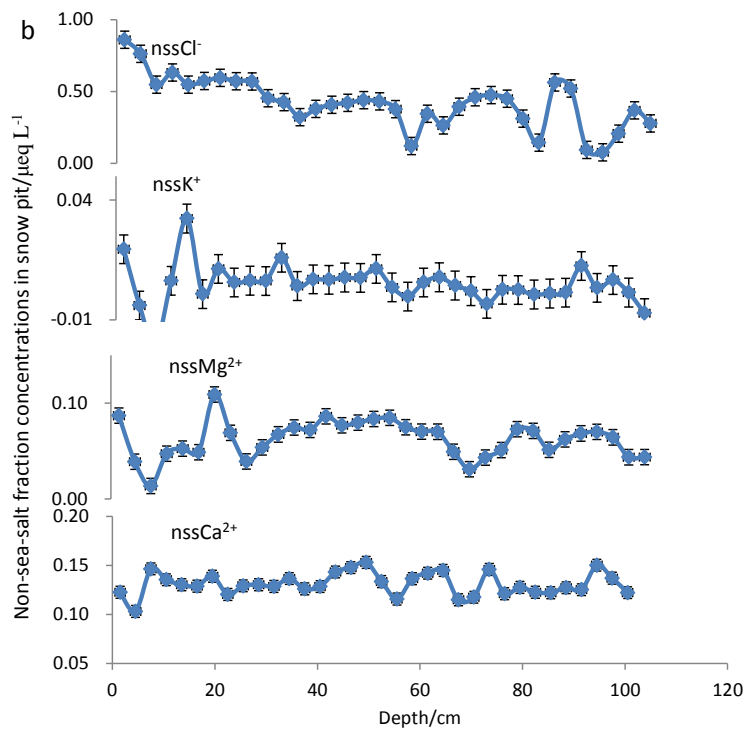

11

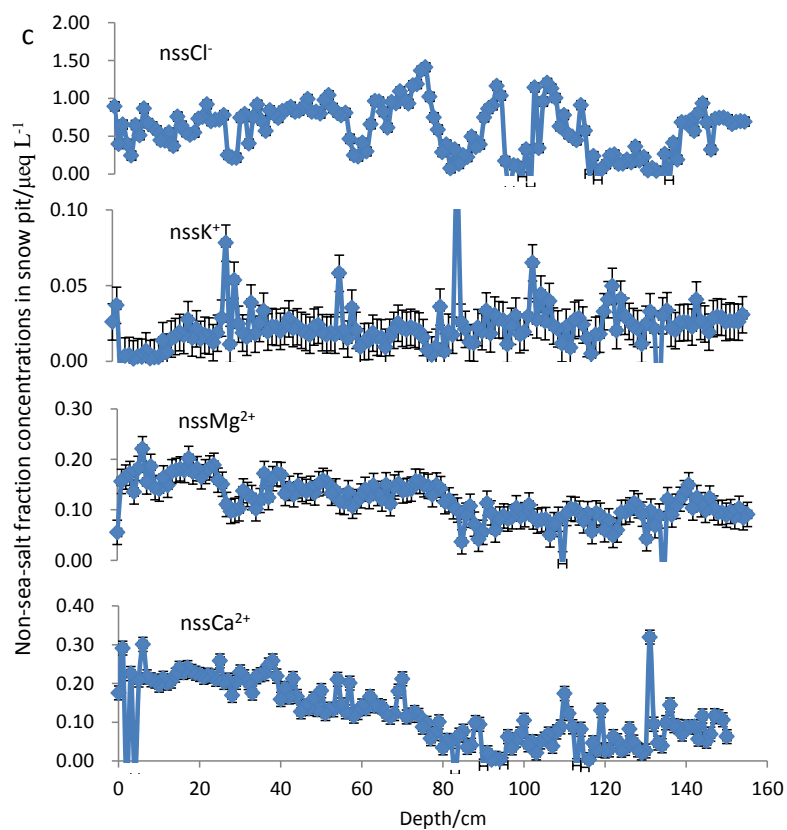

**Figure S2** Profiles of non-sea-salt fractions of ions ( $\text{nssCl}^-$ ,  $\text{nssK}^+$ ,  $\text{nssMg}^{2+}$ , and  $\text{nssCa}^{2+}$ ) in snow pits P1 (a), P2 (b), and P3 (c). Snow pits P1 and P2 were sampled in the summer season in 2015-2016, and P3 was sampled in January 2010. With error bars of  $2\sigma$ .

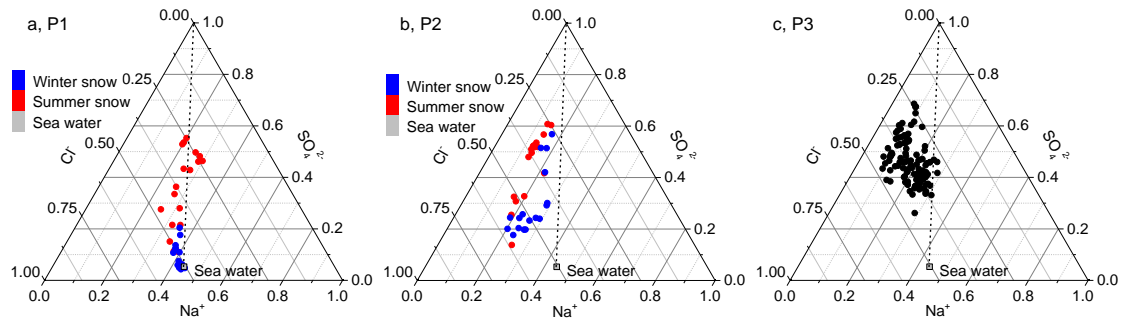

18

19 **Figure S3.** Ternary plot of  $\text{Cl}^-$ ,  $\text{Na}^+$ , and  $\text{SO}_4^{2-}$  in snow pits P1 (a), P2 (b), and P3 (c), with blue and red  
 20 dots in panels (a) and (b) representing winter and summer snow, respectively. Bulk seawater  
 21 composition is denoted by a grey square. The dashed line extending between the sea salt reference  
 22 value and the  $\text{SO}_4^{2-}$  summit represents the composition of sea salt with increasing  $\text{SO}_4^{2-}$ .
